# Supplementary material for: Perovskite Light-Emitting Devices Based on Solid-State Diffusion In Situ Dynamic Thermal Crystallization
Source: MDPI journal article supplement (doi:10.3390/mi14112084), 2023-11-11
Supplement: s1 [file s1]

## Support informations

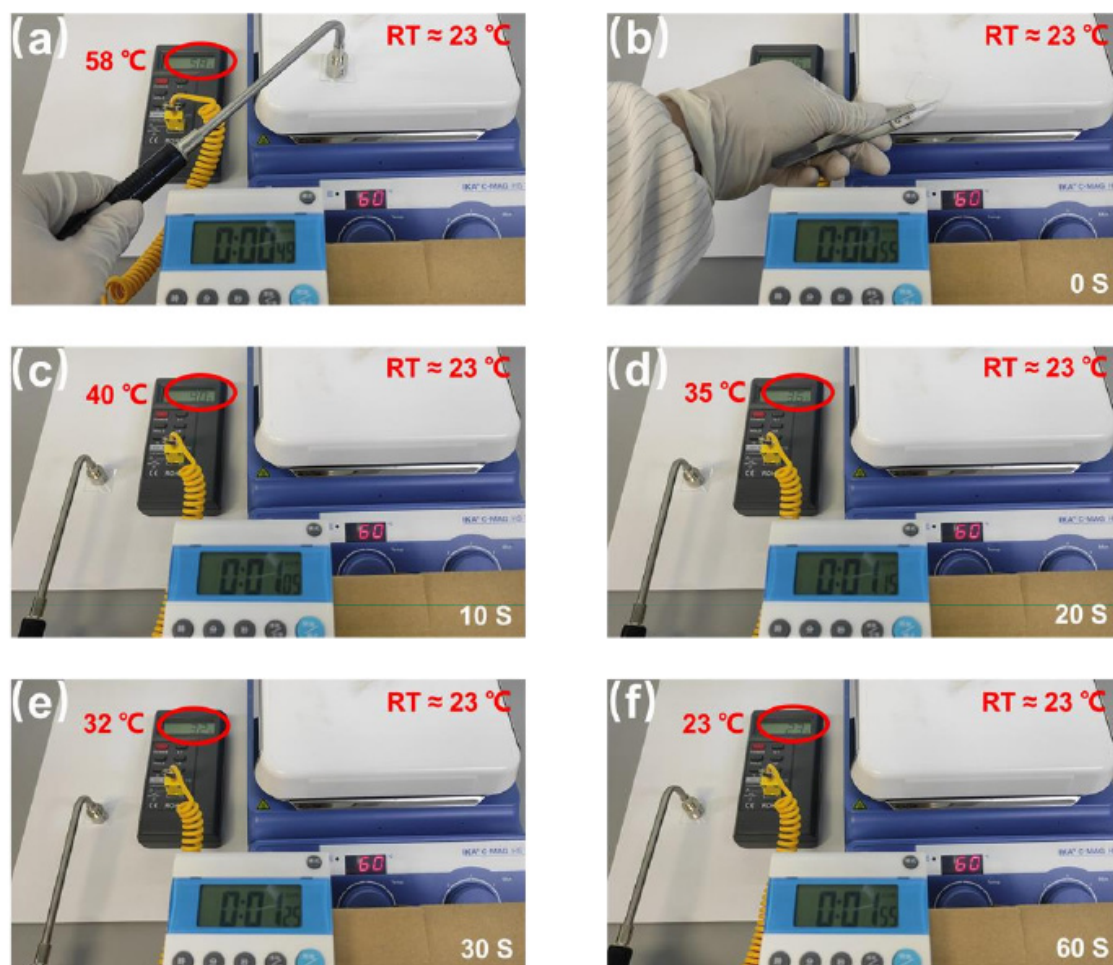

**Figure S1.** (a–f) In situ assisted thermal crystallization temperatures under different cooling times, with an ambient temperature of  $23\text{ }^{\circ}\text{C}$ .
